# Supplementary material for: The role of transketolase and octulose in the resurrection plant Craterostigma plantagineum
Source: PubMed Central journal article supplement (PMC4892735; doi:10.1093/jxb/erw174), 2016-04-29
Supplement: supp_erw174_supplementary_figures_S1_S2_table_S1.pdf [file supp_erw174_supplementary_figures_S1_S2_table_S1.pdf]

## **Supplementary data**

### **The role of transketolase and octulose in the resurrection plant *Craterostigma plantagineum***

Qingwei Zhang, Thomas Vitus Linnemann, Lukas Schreiber, Dorothea Bartels\*

\*Author for correspondence; e-mail: [dbartels@uni-bonn.de](mailto:dbartels@uni-bonn.de);

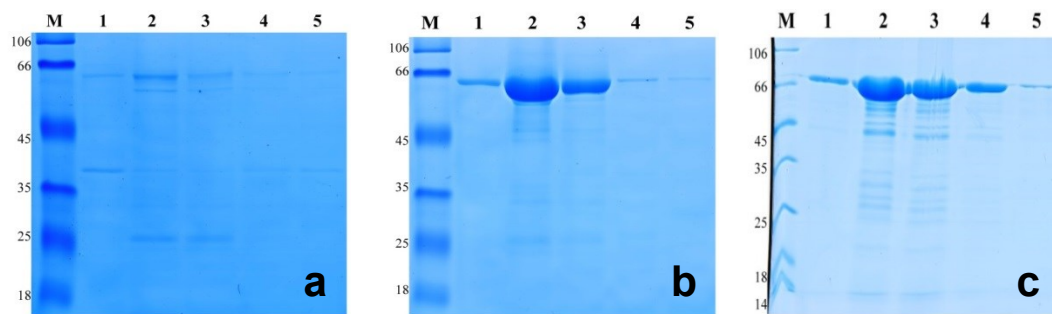

**Fig. S1.** SDS-PAGE of purified proteins: transketolase 3 (a), transketolase 7 (b) and transketolase 10 (c). From left to right in each sub-figure lanes represent the protein size markers (M) and the eluted fractions 1 to 5. The protein size markers are given in kDa.

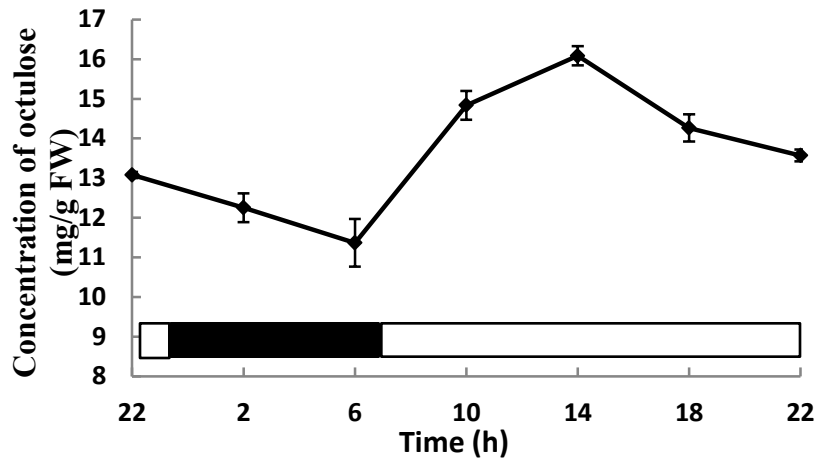

**Fig. S2.** Concentrations of octulose in *C. plantagineum* leaves within a 24-h period. Samples were collected each four hours and first sampling began at 22:00. The black bar represents the dark period and the transparent bar the light period. All data represent means  $\pm$  SD (n=3).

**Table S1** Sequences of primers used in this study.

| Primer name | Sequence 5'-3'                 |
|-------------|--------------------------------|
| tk3-Forward | CGAGGATCCATGGAAGGGTTTCTAACGAG  |
| tk3-Reverse | GCCAAGCTTTCAAATCAACTCCTTCGCAGC |
| t7-Forward  | ATAGAATTCATGGCGCCCAAGACG       |
| t7-Reverse  | CCGAAGCTTTCAGCAAATCTCCTT       |
| t10-Forward | TAAGGATCCATGGCCAAGACTACG       |
| t10-Reverse | CCTAAGCTTCTAGCACAGCTCTTT       |

The sequences underlined are restriction enzyme sites.
